# Supplementary material
Source: Copernicus journal article supplement (doi:10.5194/egusphere-2026-2784)
Supplement: Supplementary file 1 [file egusphere-2026-2784-supplement.pdf]

- 1 **Contents of this supplementary file**
- 2 Supplementary Figures S1 to S8

3 **Supplemental Figures S1–S8**

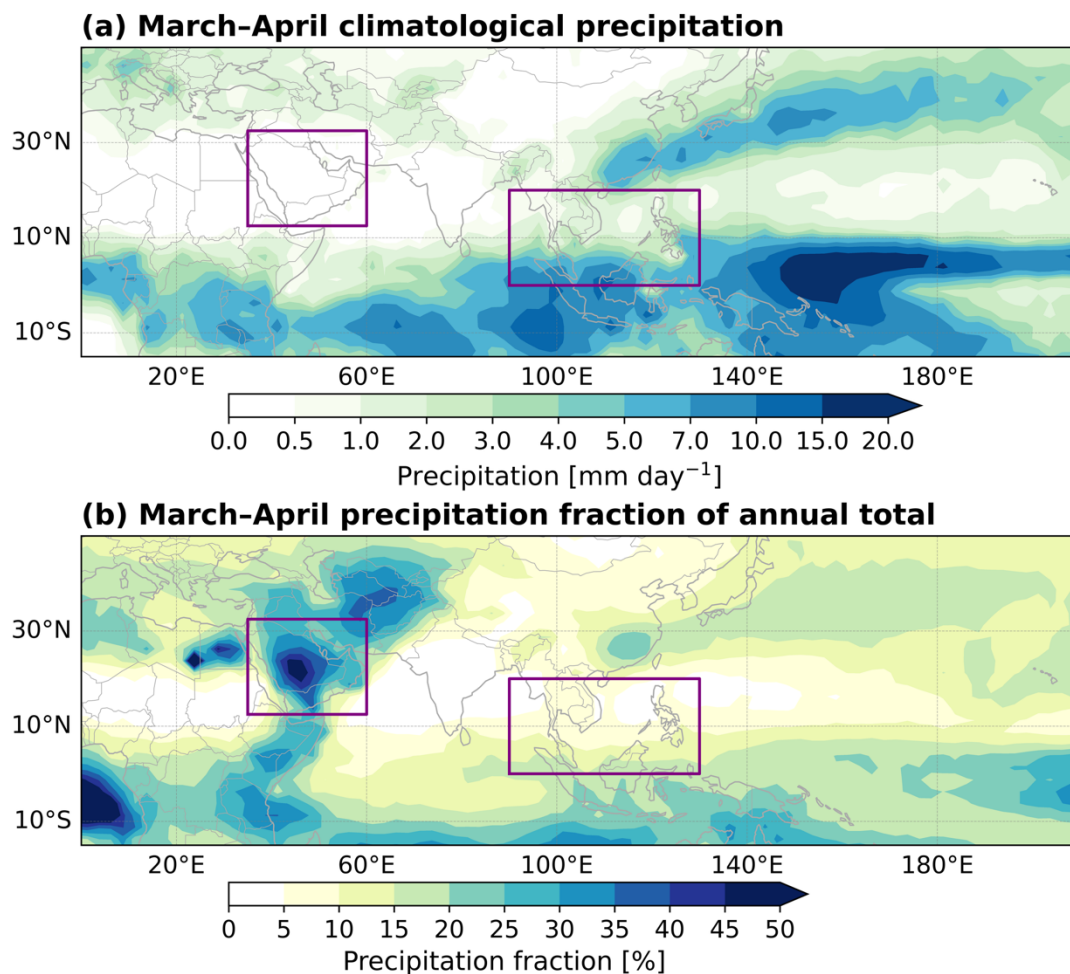

5 **Supplementary Figure S1:** Climatological March–April precipitation and its contribution to annual rainfall.  
6 (a) March–April mean precipitation climatology during 1979–2023. (b) March–April precipitation fraction of  
7 the annual total precipitation, expressed as a percentage. Purple boxes indicate the Arabian Peninsula (AP;  
8 12.5°–32.5°N, 35°–60°E) and northern Southeast Asia (SEA; 0°–20°N, 90°–130°E) regions used to define the  
9 rainfall indices. Precipitation is from CMAP and is shown in mm day<sup>-1</sup> in (a) and percentage of annual total  
10 in (b).

## Prescribed western equatorial Indian Ocean heating in DREAM

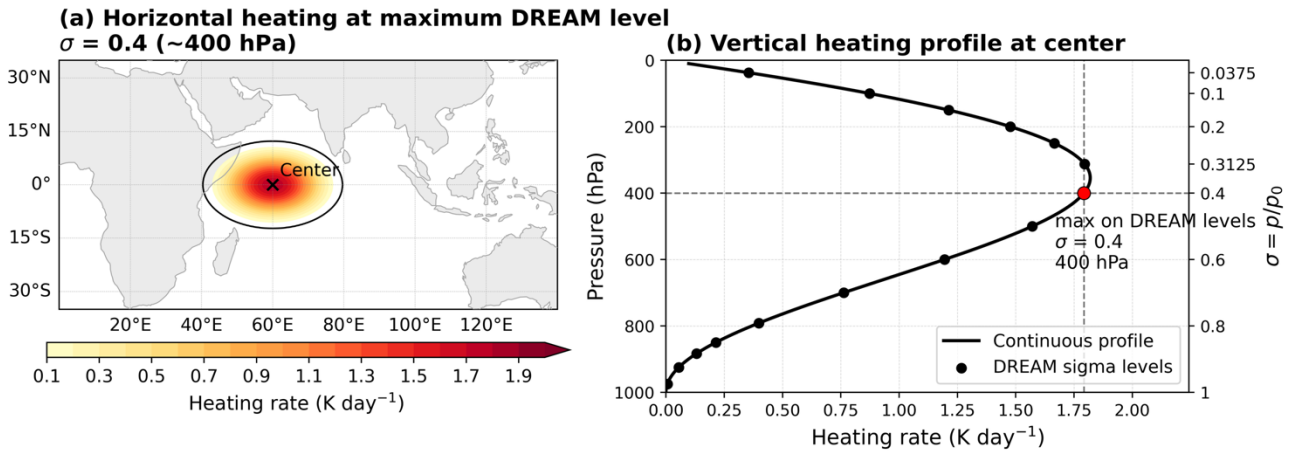

11

12 **Supplementary Figure S2:** Prescribed western equatorial Indian Ocean heating used in the DREAM  
 13 experiments. (a) Horizontal distribution of the imposed heating at  $\sigma = 0.4$  (~400 hPa), representative of the  
 14 maximum-heating layer. The heating is centered at 60°E, 0°N and has an elliptical squared-cosine structure  
 15 with horizontal radii of 20° longitude and 12.5° latitude. (b) Vertical heating profile at the heating center,  
 16 defined as  $Q(\sigma) = Q_0\pi(1 - \sigma) \sin[\pi(1 - \sigma)]$ , where  $Q_0 = 1$  K day<sup>-1</sup>. The continuous profile peaks near  $\sigma$   
 17  $= 0.35$ .

## SEA-reference rainfall and low-level circulation correlations

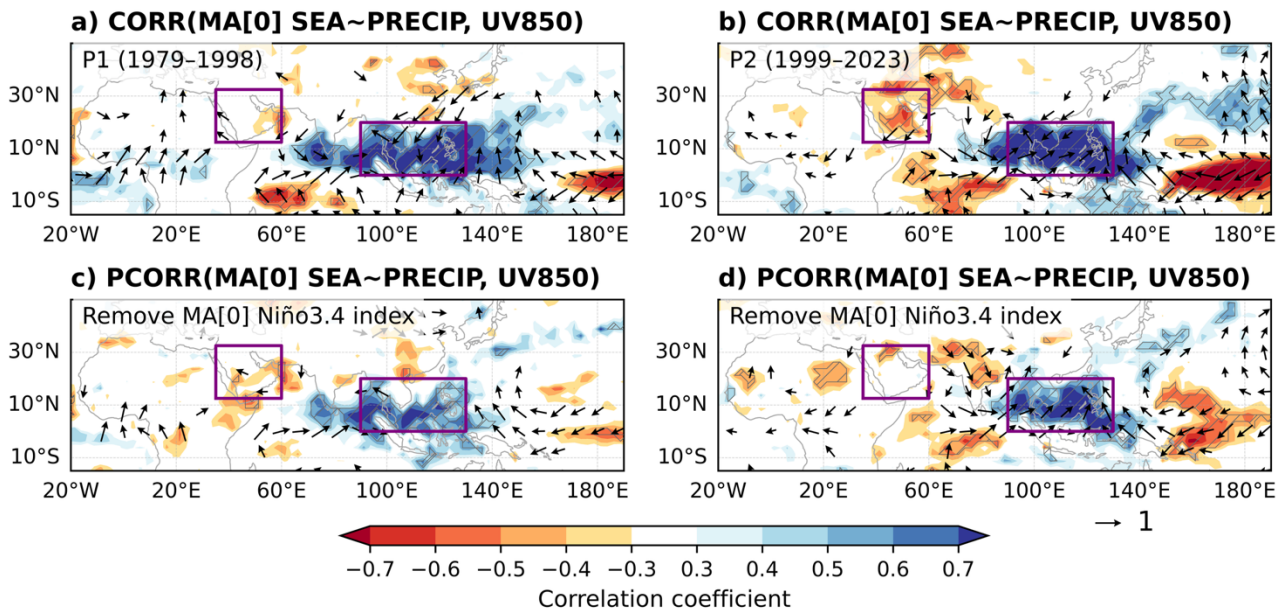

18

19 **Supplementary Figure S3:** Northern Southeast Asia-reference rainfall and low-level circulation correlations.  
 20 Correlations of March–April rainfall anomalies (shading) and 850-hPa winds (vectors) with the northern  
 21 Southeast Asia (SEA) rainfall index during (a) P1 (1979–1998) and (b) P2 (1999–2023). (c,d) As in (a,b), but  
 22 after removing March–April Niño3.4 variability. Hatching denotes statistically significant rainfall  
 23 correlations, and only significant wind vectors are shown. Purple boxes indicate the Arabian Peninsula (AP)  
 24 and northern SEA regions. This figure provides a complementary SEA-reference perspective to Fig. 1,  
 25 showing that the later-period AP–SEA rainfall and circulation linkage is weakened after removing Niño3.4  
 26 variability.

## ENSO-related Walker circulation (10°S–10°N) changes during March–April

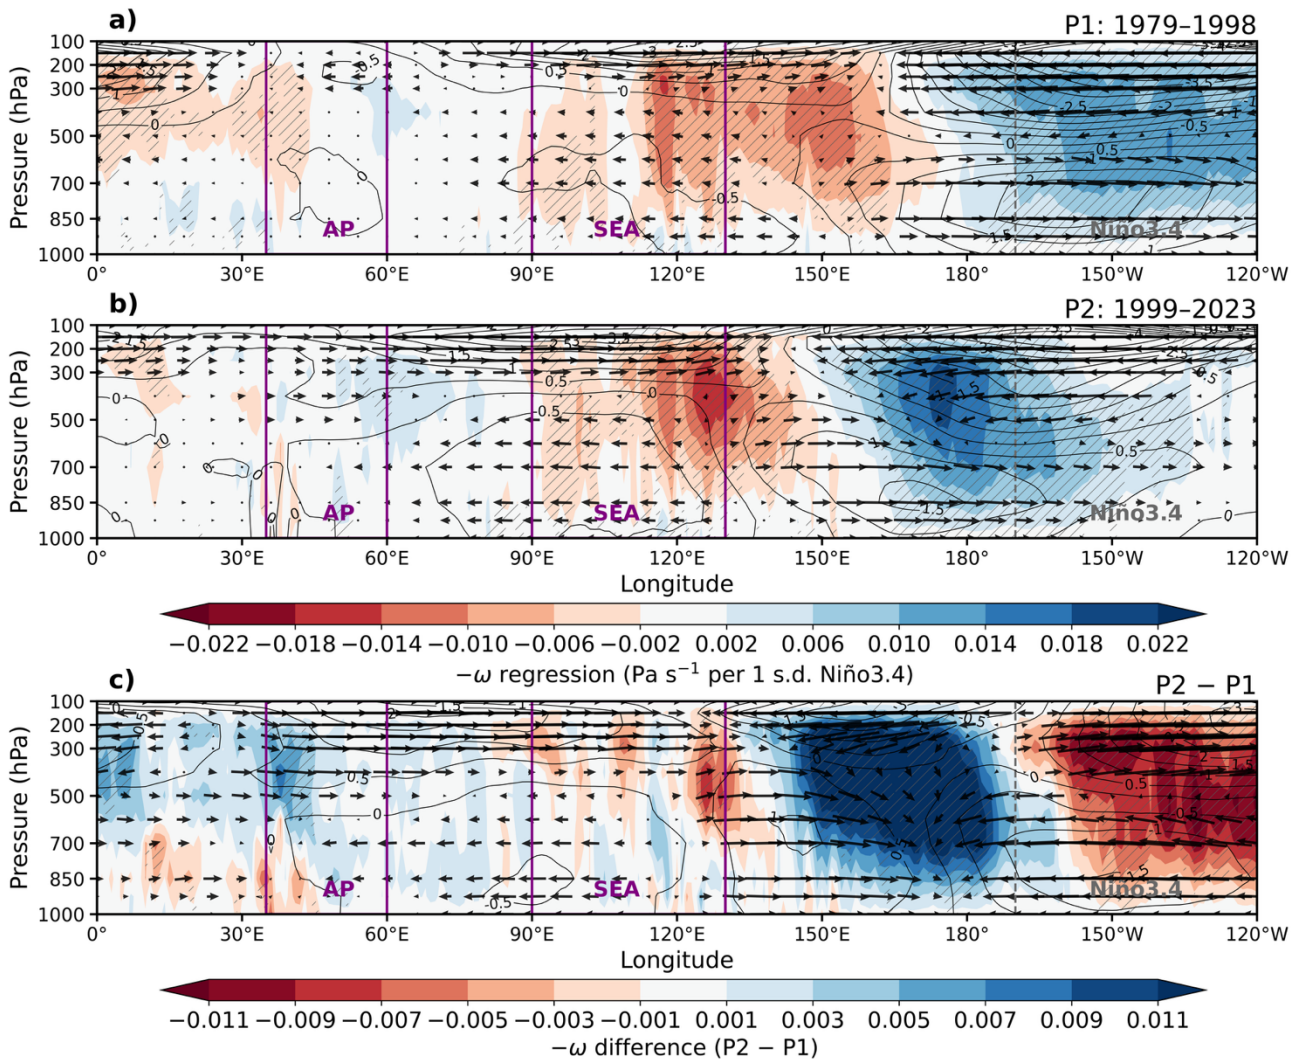

27

28 **Supplementary Figure S4:** ENSO-related Walker circulation changes during March–April. Longitude–  
 29 pressure sections of March–April regression onto the standardized Niño3.4 index, averaged over 10°S–10°N.  
 30 Shading denotes  $-\omega$  regression anomalies, so positive values indicate anomalous ascent and negative values  
 31 indicate anomalous subsidence. Vectors show the corresponding zonal–vertical divergent circulation, and  
 32 contours show the zonal divergent wind component  $u_{\chi}$ . (a) P1 (1979–1998), (b) P2 (1999–2023), and (c) P2–  
 33 P1 difference. Hatching indicates regions significant at the 95% confidence level. Purple vertical lines mark  
 34 the AP, SEA, and Niño3.4 longitude ranges.

## Meridional structure of ENSO-related vertical circulation

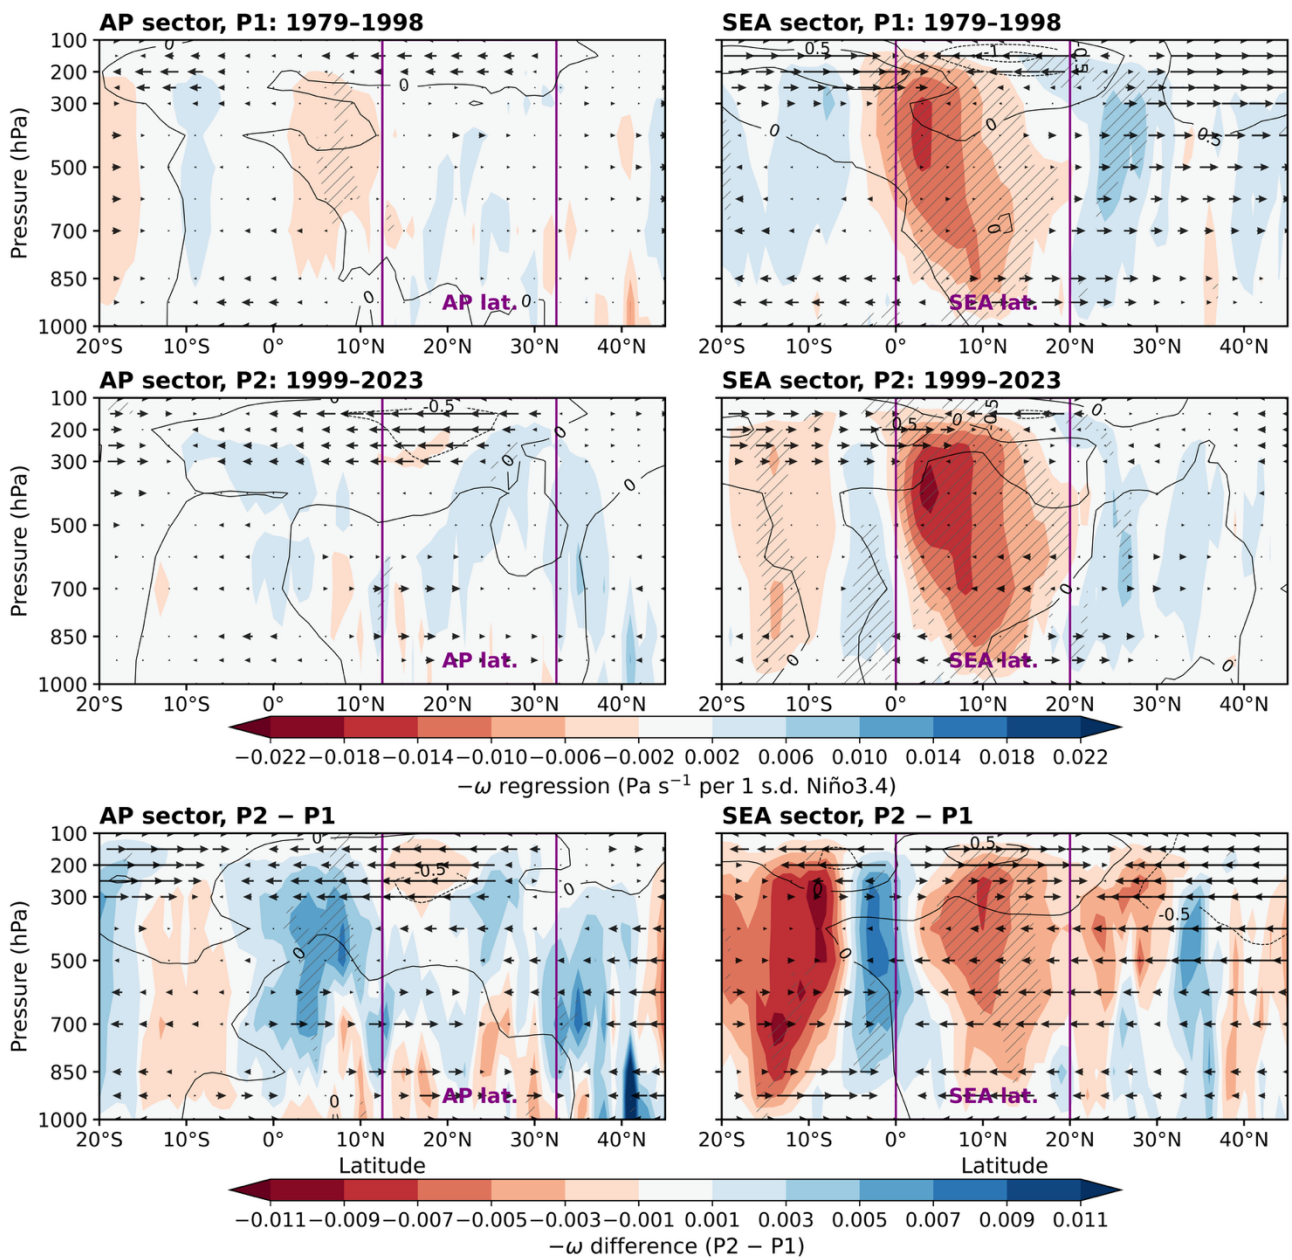

35

36 **Supplementary Figure S5:** Meridional structure of ENSO-related vertical circulation during March–April.  
 37 Latitude–pressure sections of March–April regression onto the standardized Niño3.4 index. Shading denotes  $-\omega$   
 38 regression anomalies, so positive values indicate anomalous ascent and negative values indicate anomalous  
 39 subsidence. Vectors show the corresponding meridional–vertical divergent circulation, and contours show the  
 40 meridional divergent wind component  $v\chi$ . The left column shows the AP sector averaged over 35°–60°E, and  
 41 the right column shows the northern SEA sector averaged over 90°–130°E. The first two rows show P1  
 42 (1979–1998) and P2 (1999–2023), respectively; the bottom row shows the P2–P1 difference. Hatching  
 43 indicates regions significant at the 95% confidence level. Purple vertical lines mark the AP and northern SEA  
 44 latitude ranges used in the analysis.

## Regional Hadley circulation response to ENSO during March–April

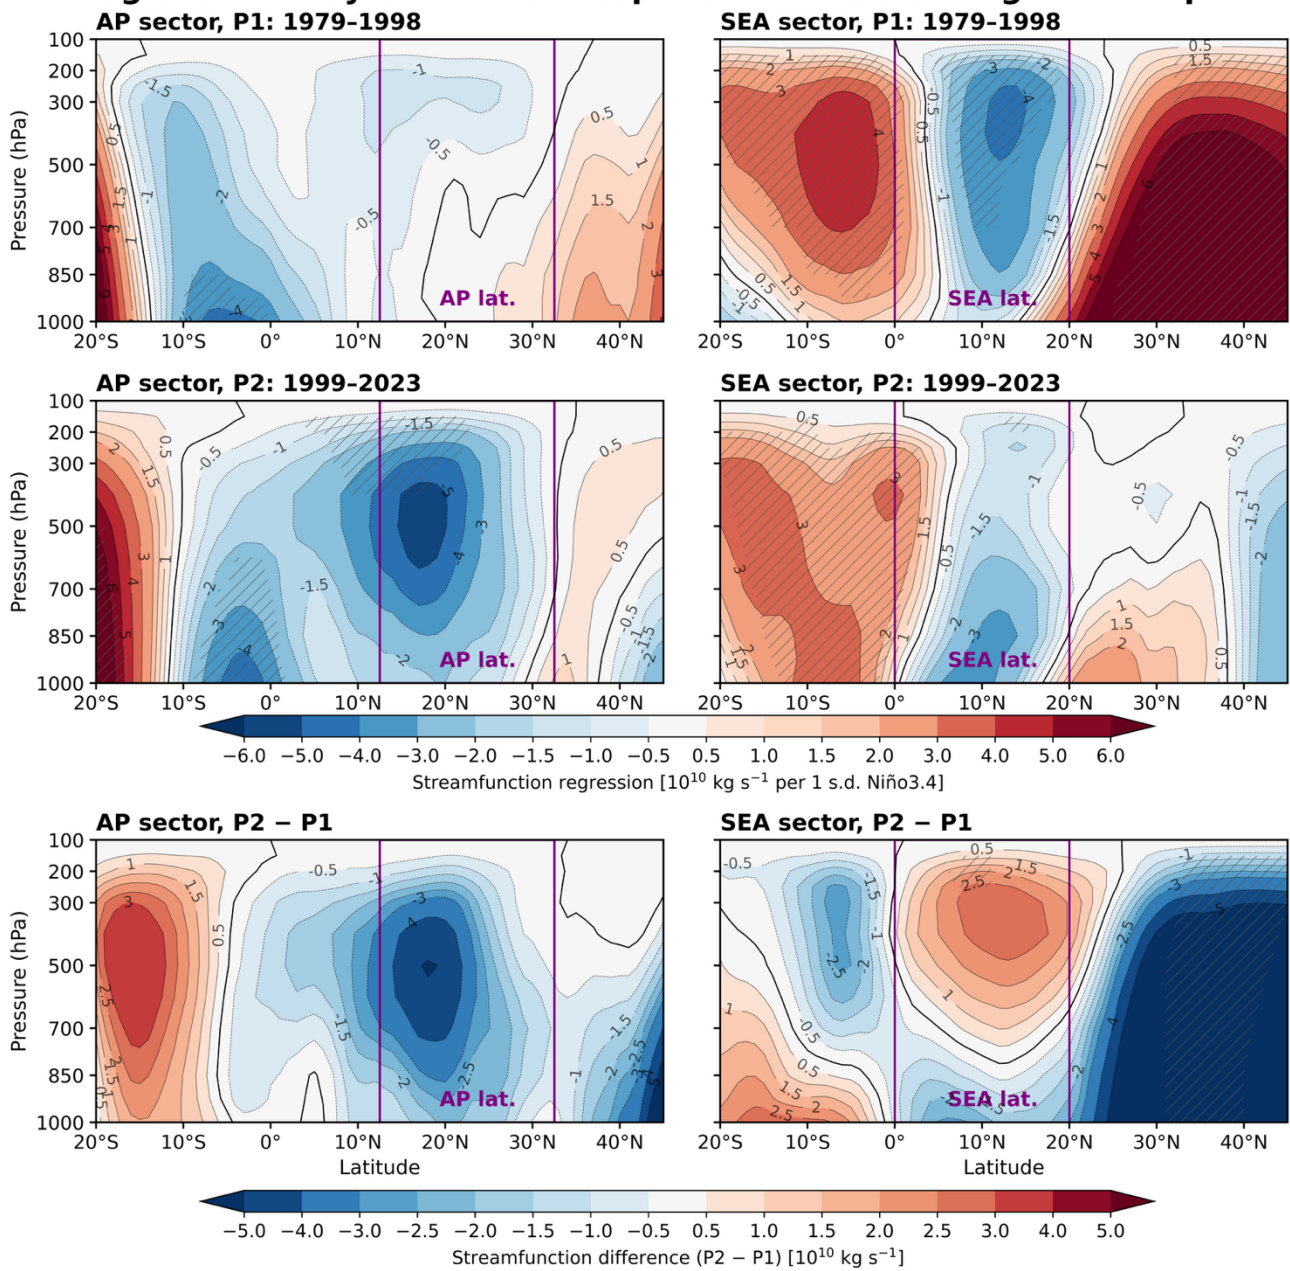

45

46 **Supplementary Figure S6:** Regional Hadley circulation response to ENSO during March–April. Latitude–  
 47 pressure sections of March–April meridional mass streamfunction regression onto the standardized Niño3.4  
 48 index. The left column shows the AP sector averaged over 35°–60°E, and the right column shows the northern  
 49 SEA sector averaged over 90°–130°E. The first two rows show P1 (1979–1998) and P2 (1999–2023),  
 50 respectively; the bottom row shows the P2–P1 difference. Shading and contours denote the meridional mass  
 51 streamfunction regression anomalies in units of  $10^{10} \text{ kg s}^{-1}$  per 1 s.d. Niño3.4 for P1 and P2, and the  
 52 corresponding regression difference for P2–P1. Hatching indicates regions significant at the 90% confidence  
 53 level. Purple vertical lines mark the AP and northern SEA latitude ranges used in the analysis.

### Time-varying coupling among ENSO, Walker circulation, regional overturning, and AP-SEA rainfall

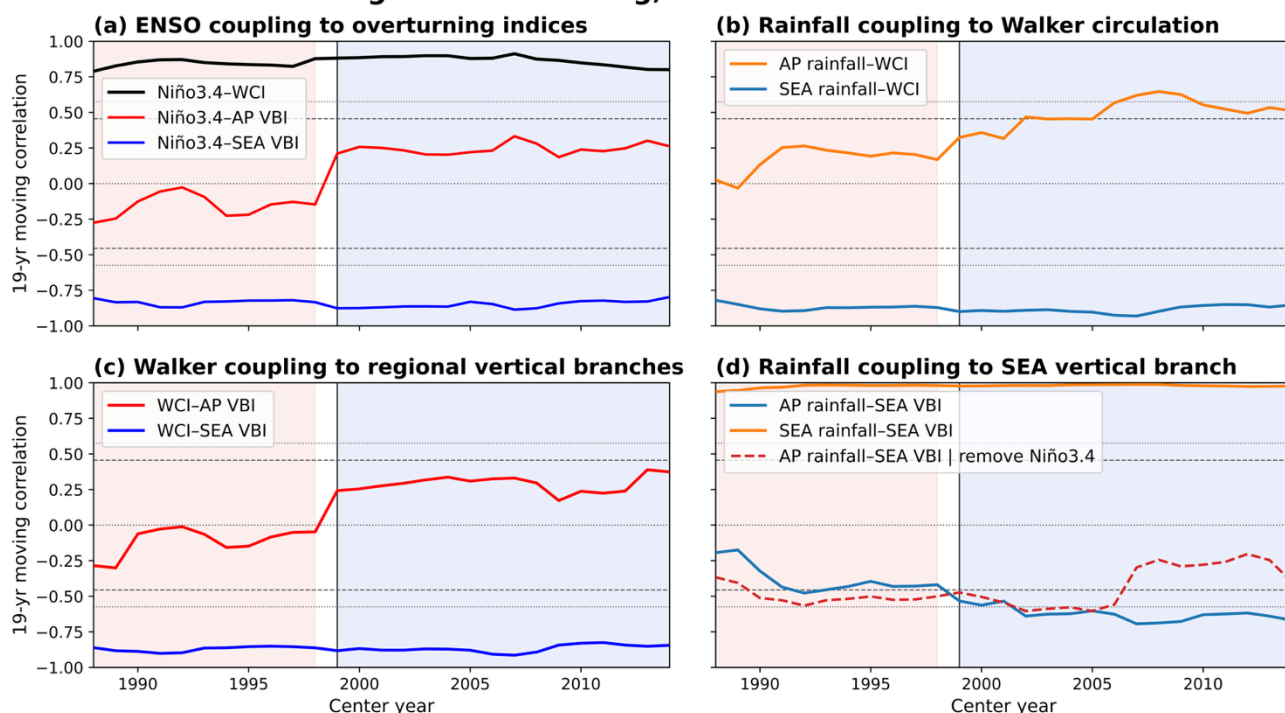

54

55 **Supplementary Figure S7:** Time-varying coupling among ENSO, Walker circulation, regional overturning,  
 56 and AP-SEA rainfall. 19-year moving correlations among the March-April Niño3.4 index, Walker circulation  
 57 index (WCI), regional vertical-branch indices (VBI), and rainfall indices over the Arabian Peninsula (AP) and  
 58 northern Southeast Asia (SEA). The WCI is defined from the sea-level pressure anomaly difference between  
 59 the eastern and western tropical Pacific, with the sign reversed so that positive values correspond to an El  
 60 Niño-like weakening of the Pacific Walker pressure gradient. The VBI is defined using 700–300-hPa layer-  
 61 mean  $-\omega$ , so positive values indicate stronger upward motion. (a) Correlations of Niño3.4 with WCI, AP VBI,  
 62 and SEA VBI. (b) Correlations of AP and SEA rainfall with WCI. (c) Correlations of WCI with AP and SEA  
 63 VBI. (d) Correlations of AP and SEA rainfall with SEA VBI; the dashed red line shows the AP rainfall-SEA  
 64 VBI relationship after removing Niño3.4 variability. Dashed and dotted horizontal lines denote the 95% and  
 65 99% significance levels, respectively. Red and blue shading mark moving-correlation windows centered in P1  
 66 and P2, respectively.

### March–April background-state changes after the late 1990s

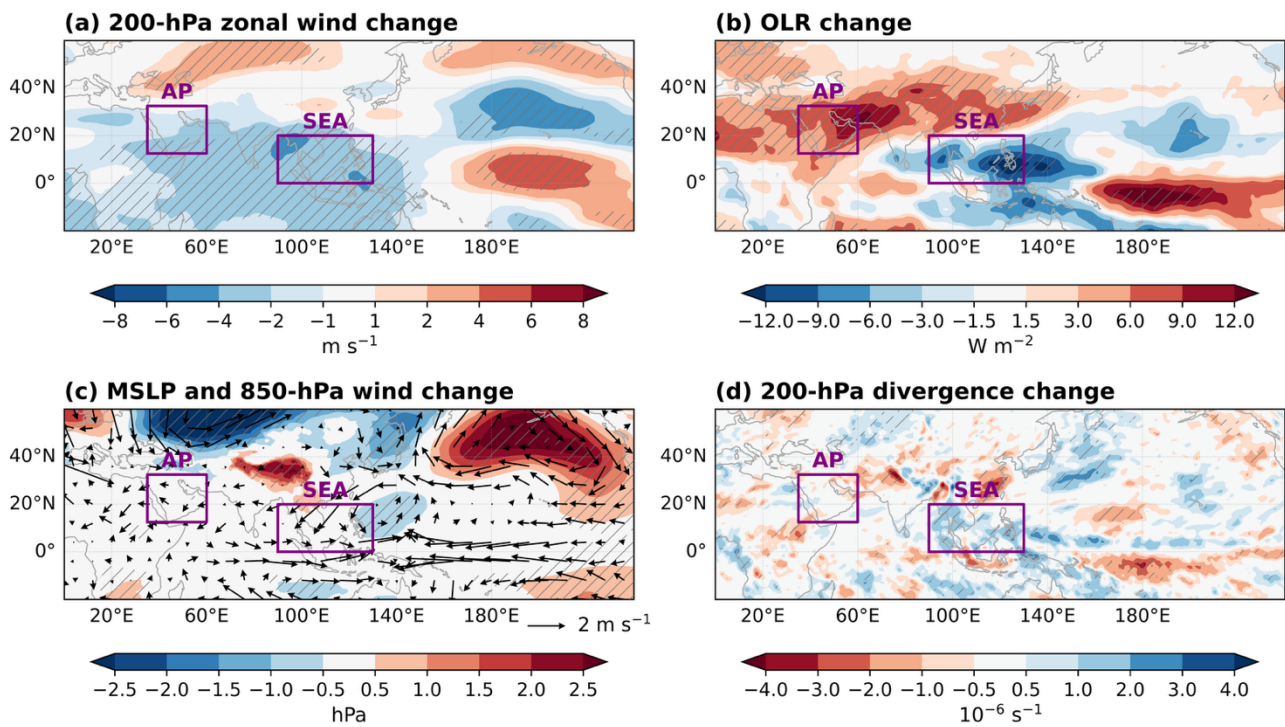

67

68 **Supplementary Figure S8:** March–April background-state changes after the late 1990s. P2–P1 differences in  
 69 March–April mean background state between P2 (1999–2023) and P1 (1979–1998). (a) Difference in 200-hPa  
 70 zonal wind. (b) Difference in outgoing longwave radiation (OLR). (c) Difference in mean sea-level pressure,  
 71 with vectors showing the corresponding 850-hPa wind changes. (d) Difference in 200-hPa horizontal  
 72 divergence. Hatching indicates regions significant at the 95% confidence level, and only significant wind  
 73 vectors are shown in (c). Purple boxes indicate the Arabian Peninsula (AP) and northern Southeast Asia  
 74 (SEA) regions. These fields show the modified March–April basic-state environment in which ENSO-related  
 75 anomalies developed after the late 1990s.
